# Supplementary material for: Case Report: Identification of a Novel Variant (m.8909T>C) of Human Mitochondrial ATP6 Gene and Its Functional Consequences on Yeast ATP Synthase
Source: MDPI journal article supplement (doi:10.3390/life10090215), 2020-09-22
Supplement: s1 [file s1]

# Supplemental Information

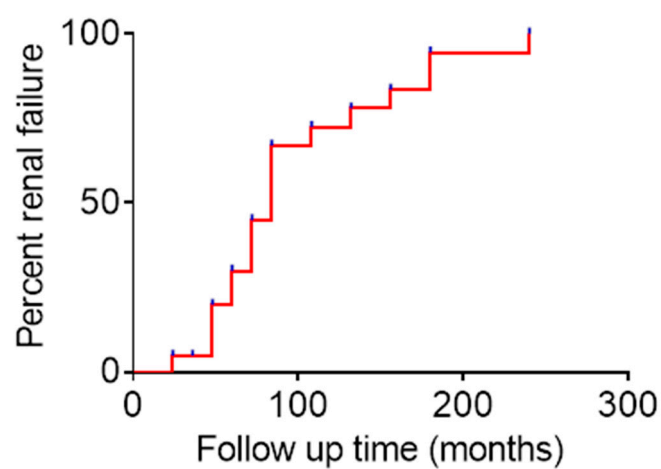

**Figure S1.** Occurrence of renal failure during follow-up of 35 previously reported m.3243G>A patients diagnosed with a nephrotic syndrome.

**Table S1.** Mean clinical characteristics of 35 previously reported m.3243G>A, patients diagnosed with a nephrotic syndrome.

| <b>Mitochondrial Disease with Kidney Involvement</b>      |                   |
|-----------------------------------------------------------|-------------------|
| Reported patients                                         | N = 35            |
| Onset age of renal disease (years)                        | 26 (6.0–59.0)     |
| Male (%)                                                  | 17 (48.6%)        |
| Family history                                            | 29 (82.9%)        |
| Proteinuria                                               | 19 (54.3%)        |
| Pathology feature                                         | N = 21            |
| FSGS                                                      | 15 (71.4%)        |
| TIN                                                       | 3 (14.3%)         |
|                                                           | N = 21            |
| Follow-up (months)                                        | 72.0 (24.0–240.0) |
| Poor Outcome <sup>a</sup>                                 | 19 (90.5%)        |
| Onset age of end stage of kidney disease or death (years) | 37 (13.0–51.0)    |

<sup>a</sup> Poor outcome means end stage of kidney disease or death at the end of follow-up. Abbreviations: TIN, tubulointerstitial nephropathy; FSGS, Focal segmental glomerulosclerosis (FSGS).

**Table S2.** Individual clinical characteristics of 35 previously reported m.3243G>A patients diagnosed with a nephrotic syndrome.

| Source | Gender | Onset age of renal disease (yrs) | Renal features                                               | Renal histology                                                         | Other clinical features                                                                 | Family history | Genotype |
|--------|--------|----------------------------------|--------------------------------------------------------------|-------------------------------------------------------------------------|-----------------------------------------------------------------------------------------|----------------|----------|
| [59]   | F      | 45                               | proteinuria                                                  | FSGS                                                                    | MELAS, hearing loss, DM                                                                 | Positive       | A3243G   |
| [59]   | M      | 38                               | renal insufficiency, hemodialysis                            | FSGS                                                                    | MELAS, hearing loss, DM                                                                 | Positive       | A3243G   |
| [60]   | F      | 18                               | proteinuria, edema, renal dysfunction                        | FSGS                                                                    | MELAS                                                                                   | Negative       | A3243G   |
| [61]   | M      | 18                               | NS, hematuria, renal failure at age of 24                    | FSGS                                                                    | DM, neurosensory deafness and cataract                                                  | Positive       | A3243G   |
| [62]   | F      | 31                               | NS, and then progressive renal failure                       | FSGS                                                                    | DM, hearing loss, concentric left ventricular hypertrophy                               | Positive       | A3243G   |
| [63]   | F      | 47                               | NS, ESRD at age 51                                           | FSGS                                                                    | hypertrophic, DM, cardiomyopathy and sensorineural deafness                             | Negative       | A3243G   |
| [64]   | M      | 23                               | proteinuria, renal failure at the age of 38                  | FSGS                                                                    | sensorineural hearing loss, DM                                                          | Positive       | A3243G   |
|        |        |                                  |                                                              | glomerular collapses and thickening of the glomerular basement membrane |                                                                                         |                |          |
| [65]   | M      | 25                               | proteinuria                                                  |                                                                         | MELAS                                                                                   | Negative       | A3243G   |
| [66]   | M      | 37                               | proteinuria, hemodialysis at 46 years old                    |                                                                         | MELAS                                                                                   | Negative       | A3243G   |
| [63]   | F      | 41                               | proteinuria, and renal failure at 47 years old               | TIN                                                                     | neurosensory deafness, cardiomyopathy, DM, transient ischemic stroke, macular dystrophy | Positive       | A3243G   |
| [63]   | M      | 27                               | proteinuria, renal failure at the age of 33                  | TIN                                                                     | neurosensory deafness, DM, hypertrophic cardiomyopathy                                  | Positive       | A3243G   |
| [67]   | M      | 32                               | progressive renal failure                                    |                                                                         | MELAS, DM, left ventricular hypertrophy                                                 | Positive       | A3243G   |
| [68]   | F      |                                  | progressive renal failure with proteinuria                   |                                                                         | MELAS, cardiomyopathy, DM, hyperthyroidism                                              | Positive       | A3243G   |
| [69]   | F      | 26                               | proteinuria, and then progressive renal failure at age of 33 | chronic glomerulosclerosis                                              | DM, hearing loss                                                                        | Positive       | A3243G   |
| [69]   | F      | 26                               | proteinuria, and then progressive renal failure at age of 33 | chronic lobular glomerulonephritis                                      | DM, hearing loss                                                                        | Positive       | A3243G   |
| [69]   | F      | 26                               | proteinuria, and then progressive renal failure at age of 33 | FSGS                                                                    | DM, hearing loss                                                                        | Positive       | A3243G   |
| [70]   | M      | 48                               | renal insufficiency                                          |                                                                         | MELAS, deafness                                                                         | Negative       | A3243G   |
| [59]   | M      | 19                               | renal failure, dialysis at 26 years of age                   |                                                                         | MELAS                                                                                   | Positive       | A3243G   |
| [59]   | M      | 44                               | renal failure, ESRD at 48 years old                          |                                                                         | MELAS                                                                                   | Negative       | A3243G   |
| [63]   | M      | 32                               | proteinuria, ESRD at age 36 years old                        |                                                                         | muscle fatigability, sensorineural deafness, DM, cardiomyopathy                         | Positive       | A3243G   |
| [71]   | M      | 21                               | proteinuria, ESRD at 41 years old                            |                                                                         | hearing loss, DM, Wolff-Parkinson-White arrhythmia                                      | Positive       | A3243G   |
| [72]   | M      | 59                               | renal failure at age of 64                                   |                                                                         | cardiomyopathy, sensorineural deafness, DM                                              | Positive       | A3243G   |
| [73]   | M      |                                  | renal failure                                                |                                                                         | cardiomyopathy, DM, deafness, headache                                                  | Positive       | A3243G   |
| [74]   | F      | 49                               | renal failure                                                |                                                                         | cardiomyopathy, hepatic dysfunction, deafness                                           | Positive       | A3243G   |
| [75]   | F      | 46                               | ESRD and hemodialysis                                        |                                                                         | DM, sensorineural hearing loss                                                          | Positive       | A3243G   |
| [63]   | F      | 41                               | proteinuria and ESRD                                         |                                                                         | sensorineural deafness, DM                                                              | Positive       | A3243G   |

|                                 |   |    |                                                                      |      |                                                                                            |          |              |
|---------------------------------|---|----|----------------------------------------------------------------------|------|--------------------------------------------------------------------------------------------|----------|--------------|
| [76]                            | M | 25 | chronic renal failure at age of 40                                   |      | MELAS                                                                                      | Positive | A3243G       |
| [77]                            | M | 6  | proteinuria                                                          | TIN  | Cataract                                                                                   | Positive | A3243G       |
| [78]                            | F | 12 | NS, facial edema, renal failure and peritoneal dialysis at age of 14 | FSGS | MELAS, Alport syndrome, DN                                                                 | Positive | A3243G       |
| [79]                            | M | 13 | proteinuria                                                          | FSGS | DM, growth hormone deficiency                                                              | Positive | A3243G       |
| [80]                            | F | 10 | proteinuria                                                          | FSGS | short in stature                                                                           | Positive | A3243G       |
| [80]                            | F | 17 | proteinuria                                                          | FSGS | short in stature                                                                           | Positive | A3243G       |
| [80]                            | F | 14 | proteinuria, Renal failure at age of 25                              | FSGS | short in stature                                                                           | Positive | A3243G       |
| [80]                            | F | 15 | proteinuria, Dialysis at age of 28                                   | FSGS | hearing disturbance, short in stature                                                      | Positive | A3243G       |
| [81]                            | F | 14 | proteinuria                                                          | FSGS | DM, hearing loss and mild hypothyroidism, growth retardation                               | positive | A3243G       |
| <b>The Patient in Our Study</b> |   |    |                                                                      |      |                                                                                            |          |              |
|                                 | F | 14 | NS, ESRD and died at age 14                                          | MPGN | MELAS, hemiplegia, epileptic episodes, aphasia, blindness and deafness, hyper lactacidemia | Negative | A3243GT8909C |

ESRD, Kidney failure or end-stage renal disease; MELAS, mitochondrial encephalomyopathy lactic acidosis and stroke-like episodes; TIN, tubulointerstitial nephropathy; FSGS, Focal segmental glomerulosclerosis.
